# Supplementary material for: The BACH project protocol: an international multicentre total Bile Acid Comparison and Harmonisation project and sub-study of the TURRIFIC randomised trial
Source: publisher site journal article supplement (doi:10.1515/cclm-2021-0496), 2021-08-06
Supplement: Supplementary file 1 [file j_cclm-2021-0496_suppl_002.xlsx]

## Sheet: Table of Contents
	Thank you for agreeing to participate in this Total Bile Acid (TBA) comparison and harmonisation project.
	Table of Contents
	Hyper-links will take you directly to the appropriate tab.
	Instructions -	Instructions for uniform sample handling and use of this template.
	Participant Contact Information -	Contact details for participating laboratory. (All results will be anonymised.)
	Methodology Questionnaire -	Please provide responses to the methodology questions.
	Results Entry Page -	Result entry page for Total Bile Acid Results.
	Coordinator Contact Details -	Contact details for Coordinator of the Total Bile Acid Harmonisation Project, should questions arise.
													Document Control
													2019-08-11	v0.1	Initial Design
													2019-08-12	v0.2	Added details
													2019-11-18	v0.3	Update results page
													2019-11-19	v0.4	Update results page
													2020-01-07	v0.5	Edits to text
													2020-05-03	v0.6	Revsion Methodolody and Results Entry tabs.
													2020-05-04	v0.7	Revsion formulas Results Entry tab.
													2020-05-05	v0.8	Locked tabs.
													2020-09-14	v0.9	Expanded Results Entry page.
													2020-10-14	v1.0	Expanded Questionnaire

## Sheet: Instructions
		Template instructions
		Cells with a brown coloured background shown below, should have results entered here.
		Sample handling instructions
		Please keep samples frozen preferably at -70oC (if unavailable -20oC acceptable)
		1. Samples are labelled by week and sample number, eg sample number 2.4 is week two and sample four.
		2. Laboratory internal QC should be assayed and acceptable performance confirmed before continuing.
		3. Remove comparison samples due for analysis from freezer and thaw at room temperature.
		4. Gently mix by inversion 10 times and centrifuge samples at 2000g for 2 minutes.
		5. Please split serum samples into two separate analyser sample cups for assay in duplicate.
		6. The first aliquot samples should be assayed in increasing numerical order, eg 1.1, 1.2, 1.3 etc
		7. The second aliquot should be assayed from the second cup and in reverse numerical order, eg 1.5, 1.4, 1.3 etc
		8. On completion of all assays, internal QC performed again and checked.
		9a. Enter Total Bile Acid results into Results Entry Page, if possible, please report to one decimal place, eg 47.5, and units in micromoles/L.
		9b. An example of data entry format requirements is diplayed below.
		10a. If duplicate results pass Allowable Limits of Performance (ALP) criteria automatically calculated, return samples to freezer for storage.
			Allowable Limit of Performance (ALP) based on Royal College of Pathologists: External Quality Assurance Program
			Total Bile Acids: +/- 4 umol/L up to 40 umol/L; 10% for >40 umol/L.
		10b. Should a sample fail ALP criteria, please assay either aliquot once more and record third result in Triplicate column.
		11. Once all samples are completed, please return a copy of this template with results to the coordinator via e-mail.
		Thank You.
		Thank you for agreeing to be a part of this Bile Acid harmonisation project.
		Your participation is greatly appreciated, Corey Markus, Medical Scientist, Adelaide, South Australia.
		Example Results Entry
				Week	Sample No	Result 1	Result 2	Difference	% Difference	ALP Acceptance	Sample No	Triplicate
	Assay Date		2020-05-05	Week XX	XX.1	17.7	19.3	-1.6	-8.64865	PASS	1.1
	QC Acceptable?		Yes		XX.2	45.6	52.3	-6.7	-13.6874	FAIL	1.2	47.3
					XX.3	6.6	12.2	-5.6	-59.5745	FAIL	1.3	10.2
					XX.4	112.3	116.6	-4.3	-3.7571	PASS	1.4
					XX.5	90.6	93.5	-2.9	-3.15046	PASS	1.5

## Sheet: Participant Contact Information
	Participating Laboratory Contact Information
	Name:
	Email:
	Company/Institution:
	Site:
	Address:
	Contact Number:

## Sheet: Methodology Questionnaire
	Methodology Questionnaire
	Reagent-	Response-
	Reagent Manufacturer:
	Reporting Units:
	Reporting Interval: eg nearest whole number, one decimal place.
	Lower Limit of Quantitation:
	Measuring Range:
	Reagent Lot Numbers Used:
	Method principal: (eg: enzymatic thio-NADH cycling, enzymatic - formazan dye, LC-MS, GC-MS)
	Reagent Generation: (if applicable)
	Analytical Platform-
	Platform Manufacturer:
	Platform Model
	Source of instrument settings/parameters: Automated platforms:- eg reagent or instrument manufacturer recommended settings, or other. Non-Automated platforms:- method source/journal reference.
	In Vitro Diagnostic Device (IVD)-
	Is assay performed according to manufacturers Instructions For Use (IFU)? eg not considered an in-house IVD.
	If the assay is considered an in house IVD, what modification has been made and for what purpose? eg increased sample:reagent.
	Is sample preparation/extraction required? If so outline method used?
	With what frequency is the assay performed? eg daily, weekly, random access.
	Calibrator-
	Calibrator Manufacturer:
	Calibrator Set Point:
	Calibration Frequency:
	Calibrator Lot Numbers Used:
	Reference Interval-
	Reference Interval:
	Call Limit/Critical Limit (if applicable)
	Quality Control-
	Internal QC Manufacturer:
	QC Frequency:
	Number of levels assayed:
	Low Level QC Target
	Low Level QC SD
	High Level QC Target
	High Level QC SD
	If Performed-
	Median Level QC Target
	Median Level QC SD

## Sheet: Results Entry Page
	Results entry page for Total Bile Acids (Units in micromol/L)
												ALP- Allowable Limits of Performance (RCPA QAP)		Yes	No
			Replicate Total Bile Acid Results.									ALP: +/- 4umol/L up to 40 umol/L; 10% for >40 umol/L.
		Week	Sample No	Result 1	Result 2	Difference	% Difference	ALP Acceptance	Sample No	Triplicate
Assay Date	dd/mm/yyyy	Week 1	1.1						1.1
QC Acceptable?			1.2						1.2
			1.3						1.3
			1.4						1.4
			1.5						1.5
Assay Date	dd/mm/yyyy	Week 2	2.1						2.1
QC Acceptable?			2.2						2.2
			2.3						2.3
			2.4						2.4
			2.5						2.5
Assay Date	dd/mm/yyyy	Week 3	3.1						3.1
QC Acceptable?			3.2						3.2
			3.3						3.3
			3.4						3.4
			3.5						3.5
Assay Date	dd/mm/yyyy	Week 4	4.1						4.1
QC Acceptable?			4.2						4.2
			4.3						4.3
			4.4						4.4
			4.5						4.5
Assay Date	dd/mm/yyyy	Week 5	5.1						5.1
QC Acceptable?			5.2						5.2
			5.3						5.3
			5.4						5.4
			5.5						5.5
Assay Date	dd/mm/yyyy	Week 6	6.1						6.1
QC Acceptable?			6.2						6.2
			6.3						6.3
			6.4						6.4
			6.5						6.5
Assay Date	dd/mm/yyyy	Week 7	7.1						7.1
QC Acceptable?			7.2						7.2
			7.3						7.3
			7.4						7.4
			7.5						7.5
Assay Date	dd/mm/yyyy	Week 8	8.1						8.1
QC Acceptable?			8.2						8.2
			8.3						8.3
			8.4						8.4
			8.5						8.5
Assay Date	dd/mm/yyyy	Week 9	9.1						9.1
QC Acceptable?			9.2						9.2
			9.3						9.3
			9.4						9.4
			9.5						9.5
Assay Date	dd/mm/yyyy	Week 10	10.1						10.1
QC Acceptable?			10.2						10.2
			10.3						10.3
			10.4						10.4
			10.5						10.5
Assay Date	dd/mm/yyyy	Week 11	11.1						11.1
QC Acceptable?			11.2						11.2
			11.3						11.3
			11.4						11.4
			11.5						11.5
Assay Date	dd/mm/yyyy	Week 12	12.1						12.1
QC Acceptable?			12.2						12.2
			12.3						12.3
			12.4						12.4
			12.5						12.5

## Sheet: Coordinator Contact Details
		Coordinator Contact Details
		Coordinator:	Corey Markus
		Email:	corey.markus@flinders.edu.au
		Phone:	(08) 8201 7555
		Address:	Flinders University International Centre for Point-of-Care Testing
			College of Medicine & Public Health
			Sturt Road, Bedford Park South Australia 5042
			GPO Box 2100 Adelaide SA 5001
